# Supplementary material for: Dyscalculia in Early Adulthood: Implications for Numerical Activities of Daily Living
Source: MDPI journal article supplement (doi:10.3390/brainsci12030373), 2022-03-11
Supplement: s1 [file s1]

**Table S4.** Performances of people with DD and controls in the complete NADL battery.

| TEST                          | DD    |      | Controls |      | U or<br>Chi<br>square | p (one-<br>tailed) | r<br>(effect<br>size) | Bayes<br>factor<br>(Rouder<br>Method) |
|-------------------------------|-------|------|----------|------|-----------------------|--------------------|-----------------------|---------------------------------------|
|                               | Mean  | SD   | Mean     | SD   |                       |                    |                       |                                       |
| INTERVIEW                     | 7.82  | 1.59 | 9.73     | 0.45 | 89.5                  | <.001              | -0.631                | .000                                  |
| Time                          | 4.24  | 1.22 | 4.85     | 0.46 | 175.5                 | 0.004              | -0.389                | .444                                  |
| Measure                       | 0.76  | 0.44 | 1.00     | 0.00 | 6.93                  | 0.004              | -0.384                | .179                                  |
| Distance                      | 0.67  | 0.48 | 0.73     | 0.45 | .228                  | 0.315              | -0.069                | 4.165                                 |
| Communication                 | 0.95  | 0.22 | 1.00     | 0.00 | 1.26                  | 0.130              | -0.164                | 2.650                                 |
| General<br>knowledge          | 6.00  | 0.84 | 6.42     | 0.64 | 196.0                 | 0.038              | -0.259                | .874                                  |
| Money                         | 6.95  | 0.92 | 7.62     | 0.75 | 156.5                 | 0.003              | -0.403                | .208                                  |
| TOTAL<br>INFORMAL             | 19.57 | 2.86 | 21.62    | 1.10 | 130.5                 | 0.001              | -0.458                | .047                                  |
| Comparison                    | 5.81  | 0.40 | 6.00     | 0.00 | 273.0                 | 0.010              | -0.323                | .373                                  |
| Number line                   | 0.92  | 0.27 | 1.00     | 0.00 | 312.0                 | 0.076              | -0.198                | 1.915                                 |
| Digits                        | 9.85  | 0.37 | 9.69     | 0.62 | 308.0                 | 0.211              | -0.111                | 2.835                                 |
| Total number<br>comprehension | 16.58 | 0.76 | 16.69    | 0.62 | 313.0                 | 0.278              | -0.082                | 4.100                                 |
| Reading<br>numbers            | 5.00  | 0.00 | 4.88     | 0.43 | 288.0                 | 0.085              | -0.194                | 2.218                                 |
| Dictation                     | 4.92  | 0.28 | 4.92     | 0.27 | 310.0                 | 0.467              | -0.012                | 4.726                                 |
| Total<br>transcoding          | 9.92  | 0.28 | 9.81     | 0.49 | 289.0                 | 0.214              | -0.112                | 3.167                                 |
| Mental addition               | 5.69  | 0.68 | 5.77     | 0.59 | 315.0                 | 0.270              | -0.085                | 4.429                                 |
| Mental<br>subtraction         | 5.62  | 0.57 | 5.96     | 0.20 | 233.5                 | 0.002              | -0.388                | .132                                  |
| Mental<br>multiplication      | 3.85  | 1.29 | 5.50     | 0.71 | 103.5                 | <.001              | -0.618                | .000                                  |
| Total mental<br>calculation   | 15.15 | 1.67 | 17.23    | 1.14 | 102.5                 | <.001              | -0.614                | .000                                  |
| Arithmetical<br>Rules         | 6.62  | 0.70 | 6.88     | 0.33 | 281.5                 | 0.066              | -0.209                | 1.191                                 |
| Addition<br>principles        | 3.50  | 0.86 | 3.85     | 0.37 | 269.0                 | 0.047              | -0.232                | 1.014                                 |

|                           |       |      |       |      |       |       |        |       |
|---------------------------|-------|------|-------|------|-------|-------|--------|-------|
| Multiplication principles | 3.38  | 0.75 | 3.81  | 0.40 | 229.0 | 0.008 | -0.333 | .312  |
| Total Rules               | 13.5  | 1.56 | 14.53 | 0.71 | 199.5 | 0.003 | -0.379 | .087  |
| Written additions         | 5.15  | 1.16 | 5.42  | 0.81 | 308.0 | 0.270 | -0.085 | 3.158 |
| Written subtractions      | 4.35  | 1.26 | 5.50  | 0.58 | 168.5 | <.001 | -0.453 | .004  |
| Written multiplications   | 2.62  | 1.33 | 3.88  | 1.14 | 162.5 | <.001 | -0.456 | .019  |
| Total written calculation | 12.11 | 2.80 | 14.81 | 1.52 | 142.5 | <.001 | -0.500 | .003  |
| TOTAL FORMAL              | 67.21 | 4.11 | 73.07 | 2.71 | 71    | <.001 | -0.665 | .000  |
